# Supplementary material for: Screen Necroptosis-related Genes and evaluate the prognostic capacity, clinical value and the affection of their copy number variations in acute myeloid leukemia
Source: Research Square preprint supplement (doi:10.21203/rs.3.rs-4313518/v1), 2025-01-16
Supplement: Supplementary file 1 [file df0a4d03de181ad067ae5714.docx]

**Supplementary Data**

**Screen Necroptosis-related Genes and evaluate the prognostic capacity, clinical value and the affection of their copy number variations in acute myeloid leukemia**

Dake Wen1a; Ru Yan1a; Lin Zhang1a; Haoyang Zhang1; Xuyang Chen1; Jian Zhou1*

1 Nanjing Medical University Affiliated Wuxi People's Hospital, Wuxi Children’s Hospital, Wuxi, China, 214023

a These authors contributed equally to this work and share first authorship

* **Corresponding author:** Jian Zhou, E-mail address: jianzhou@njmu.edu.cn

**Mailing address:** Department of Pediatric Laboratory, Nanjing Medical University Affiliated Wuxi People's Hospital, Wuxi Children’s Hospital, 299-1, QingYang Road, Wuxi, China, 214023

## 1. materials and methods

### 1.1 Data sets merge and debatch

To obtain the differentially expressed genes (DEGs) associated with different groups (AML, Normal), we utilizing the R package sva[1] first to debatch the data sets GSE7186, GSE23143, and GSE84334 to obtain a combined data set, It contains 155 samples of acute myeloid leukemia (AML) samples and 6 samples of control (Normal) samples. After that, Principal Component Analysis (PCA) [2] is conducted on the data set before and after batch processing. The principal component analysis (PCA) method converts high-dimensional data into low-dimensional data by extracting feature vectors (components) from high-dimensional data to reduce data dimensionality and displaying these characteristics in two-dimensional or three-dimensional graphs.

### 1.2Real-time quantitative PCR(RT-qPCR) for NRDEGs

#### 1.2.1 AML cells line

Human Acute Monocytic Leukemia Cells (THP-1) (C6960, Beyotime Biotech Inc .Shanghai), were cultured in RPMI-1640 media(C11875500BT, Gibco™) that contains 10% concentration of fetal bovine serum(PAN biotech,P30-3306) and penicillin with 100U/ml concentration, and streptomycin with 0.1 mg/ml concentration. Subsequent cell culture was conducted at 37℃, 5% CO2, and 95% air for 48 h

#### 1.2.2 Bone marrow mononuclear cells (BM-MNCs)

Bone marrow from 3 healthy donors(All three are male, Donor 1, 37years old, Donor 2,39 years old, Donor 3,43 years old) were collected at Nanjing Medical University affiliated Wuxi People’s Hospital, Wuxi Children’s Hospital between July 2022 and December 2023. All donors gave informed consent. BM-MNCs were subsequently isolated using isolation medium（Solarbio Science & Technology Co., Ltd, P5050） following the manufacturer's recommendations. The procedures for the collection and use of samples in this investigation were authorized by the Ethics Committee of the hosptial (ethics approval “WXCH2023-11-090”) and certify that the study was performed in accordance with the ethical standards as laid down in the 2013 Declaration of Helsinki

#### 1.2.3 RNA Extraction and RT-qPCR

To extract BM-MNCs and THP-1 cells' total RNA, TRIzol Reagent (Invitrogen, 15596018) was utilized. Then, using the PrimeScriptTM RT reagent Kit with gDNA Eraser (Takara Bio Inc., RR047A), cDNA was reverse-transcribed. The synthesized cDNAs were amplified in the RT-qPCR using TB Green® Premix Ex Taq™ II (Takara Bio Inc.,RR820A). All protocols were performed following the manufacturer's instructions. The 2-∆∆CT algorithm was applied for calculating NRDEGs’ expression and GAPDH for normalizing them. The primers (see Table 3 in supplementary) used in RT-qPCR were manufactured by Sangon Biotech Co., Ltd. (Shanghai, China).

#### 1.2.4. Outcome statistics

The experiment outcomes were statistically evaluated utilizing GraphPad Prism 9.0 One-way ANOVA was employed to examine the variations in experimental data across the two groups; Outcomes are represented as the mean ± standard deviation. In the context of group differences, P < 0.05 was regarded significant.

### 1.3 Calibration curve

Calibration curve is a tool used to evaluate the probability of machine learning model prediction independent of AUC. It describes the accuracy and reliability of the model by plotting the relationship between the prediction probability of the model and actual observations. Values for slope and brier are used to evaluate the accuracy of the model prediction. We used R package rms to assess the agreement between predictions and observations of LASSO model. The degree of consistency between the predicted probability and actual probability of the model was visualized in Calibration curve.

### 1.4 mRNA-miRNA and mRNA-TFs(transcription factors) interaction network construction

MicroRNA Target Prediction Database (miRDB, https://mirdb.org/mirdb/index.html)[3] is a web-based repository that predicts target genes and provides functional annotations for miRNAs. We utilized the data in it to forecast the miRNAs that interact with NRDEGs. After that, the software Cytoscape[4] was employed and the mRNA-miRNA interaction networks were visualized. The CHIPBase database ( <https://rna.sysu.edu.cn/chipbase/>)[5] had forecast millions of TF-gene regulation interactions by identifying thousands of binding motif arrays and their binding sites using ChIP-seq data on DNA binding proteins. The hTFtarget database[6] (<http://bioinfo.life.hust.edu.cn/hTFtarget>) includes detailed information about human TFs and target regulatory interactions corresponding to them. We searched the two databases for TFs associated with NRDEGs and exhibited them using Cytoscape.

## 2. Results

### 2.1 Batching impact in the merged datasets was removed

R package sva was used to eliminate the batching impact in the merged datasets comprised of GSE7186, GSE23143, and GSE84334 to obtain the combined GEO data sets. The combined data sets were then compared before and after eliminating the batch effect by means of distribution box plots and PCA (principal component analysis) graph (supplementary Figure S1A–D). Distribution box plot and PCA graph showed that the batch effect of the specimens in the combined data set is basically removed following the batch elimination.

###
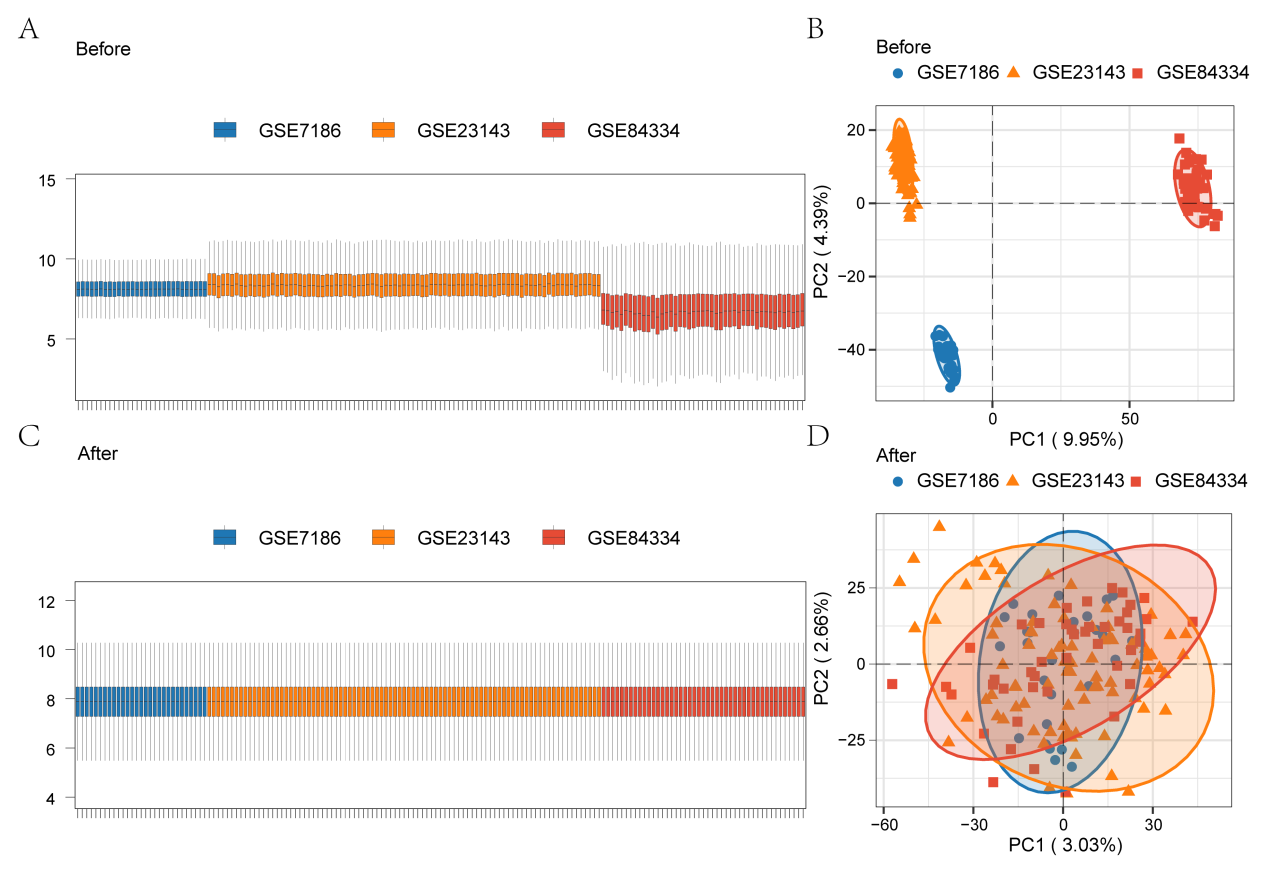


**Figure S1. Data set merge correction**

**A-B.** Boxplot **(A)** and PCA graph **(B)** of the merged data sets before batch elimination. **C-D.** The Boxplot**(C)** and PCA graph **(D)** of the merged data set after batch elimination. **PCA,** Principal Component Analysis.

### 2.2 hub-NRDEGs expression trends in cell experiments matched the result through analysis

To validate whether hub-NRDEGs expression matches the calculation results, we use RT-qPCR and measured the relative expression levels of the 6 hub-NRDEGs in AML cell line (THP-1) and the BM-MNCs of health donors. The outcomes (supplementary Figure S2) showed that the relative expression levels of *PARP-1, SLC25A5* was greater in THP-1 than that in BM-MNCs of health donors while that of *PYGL, CTSS, NFKB1, ZNF217* were lower in AML THP-1 than that in BM-MNCs of health donors. The tendency was same as that in Histogram of group comparison (Figure 2E) that was analyzed above.

###
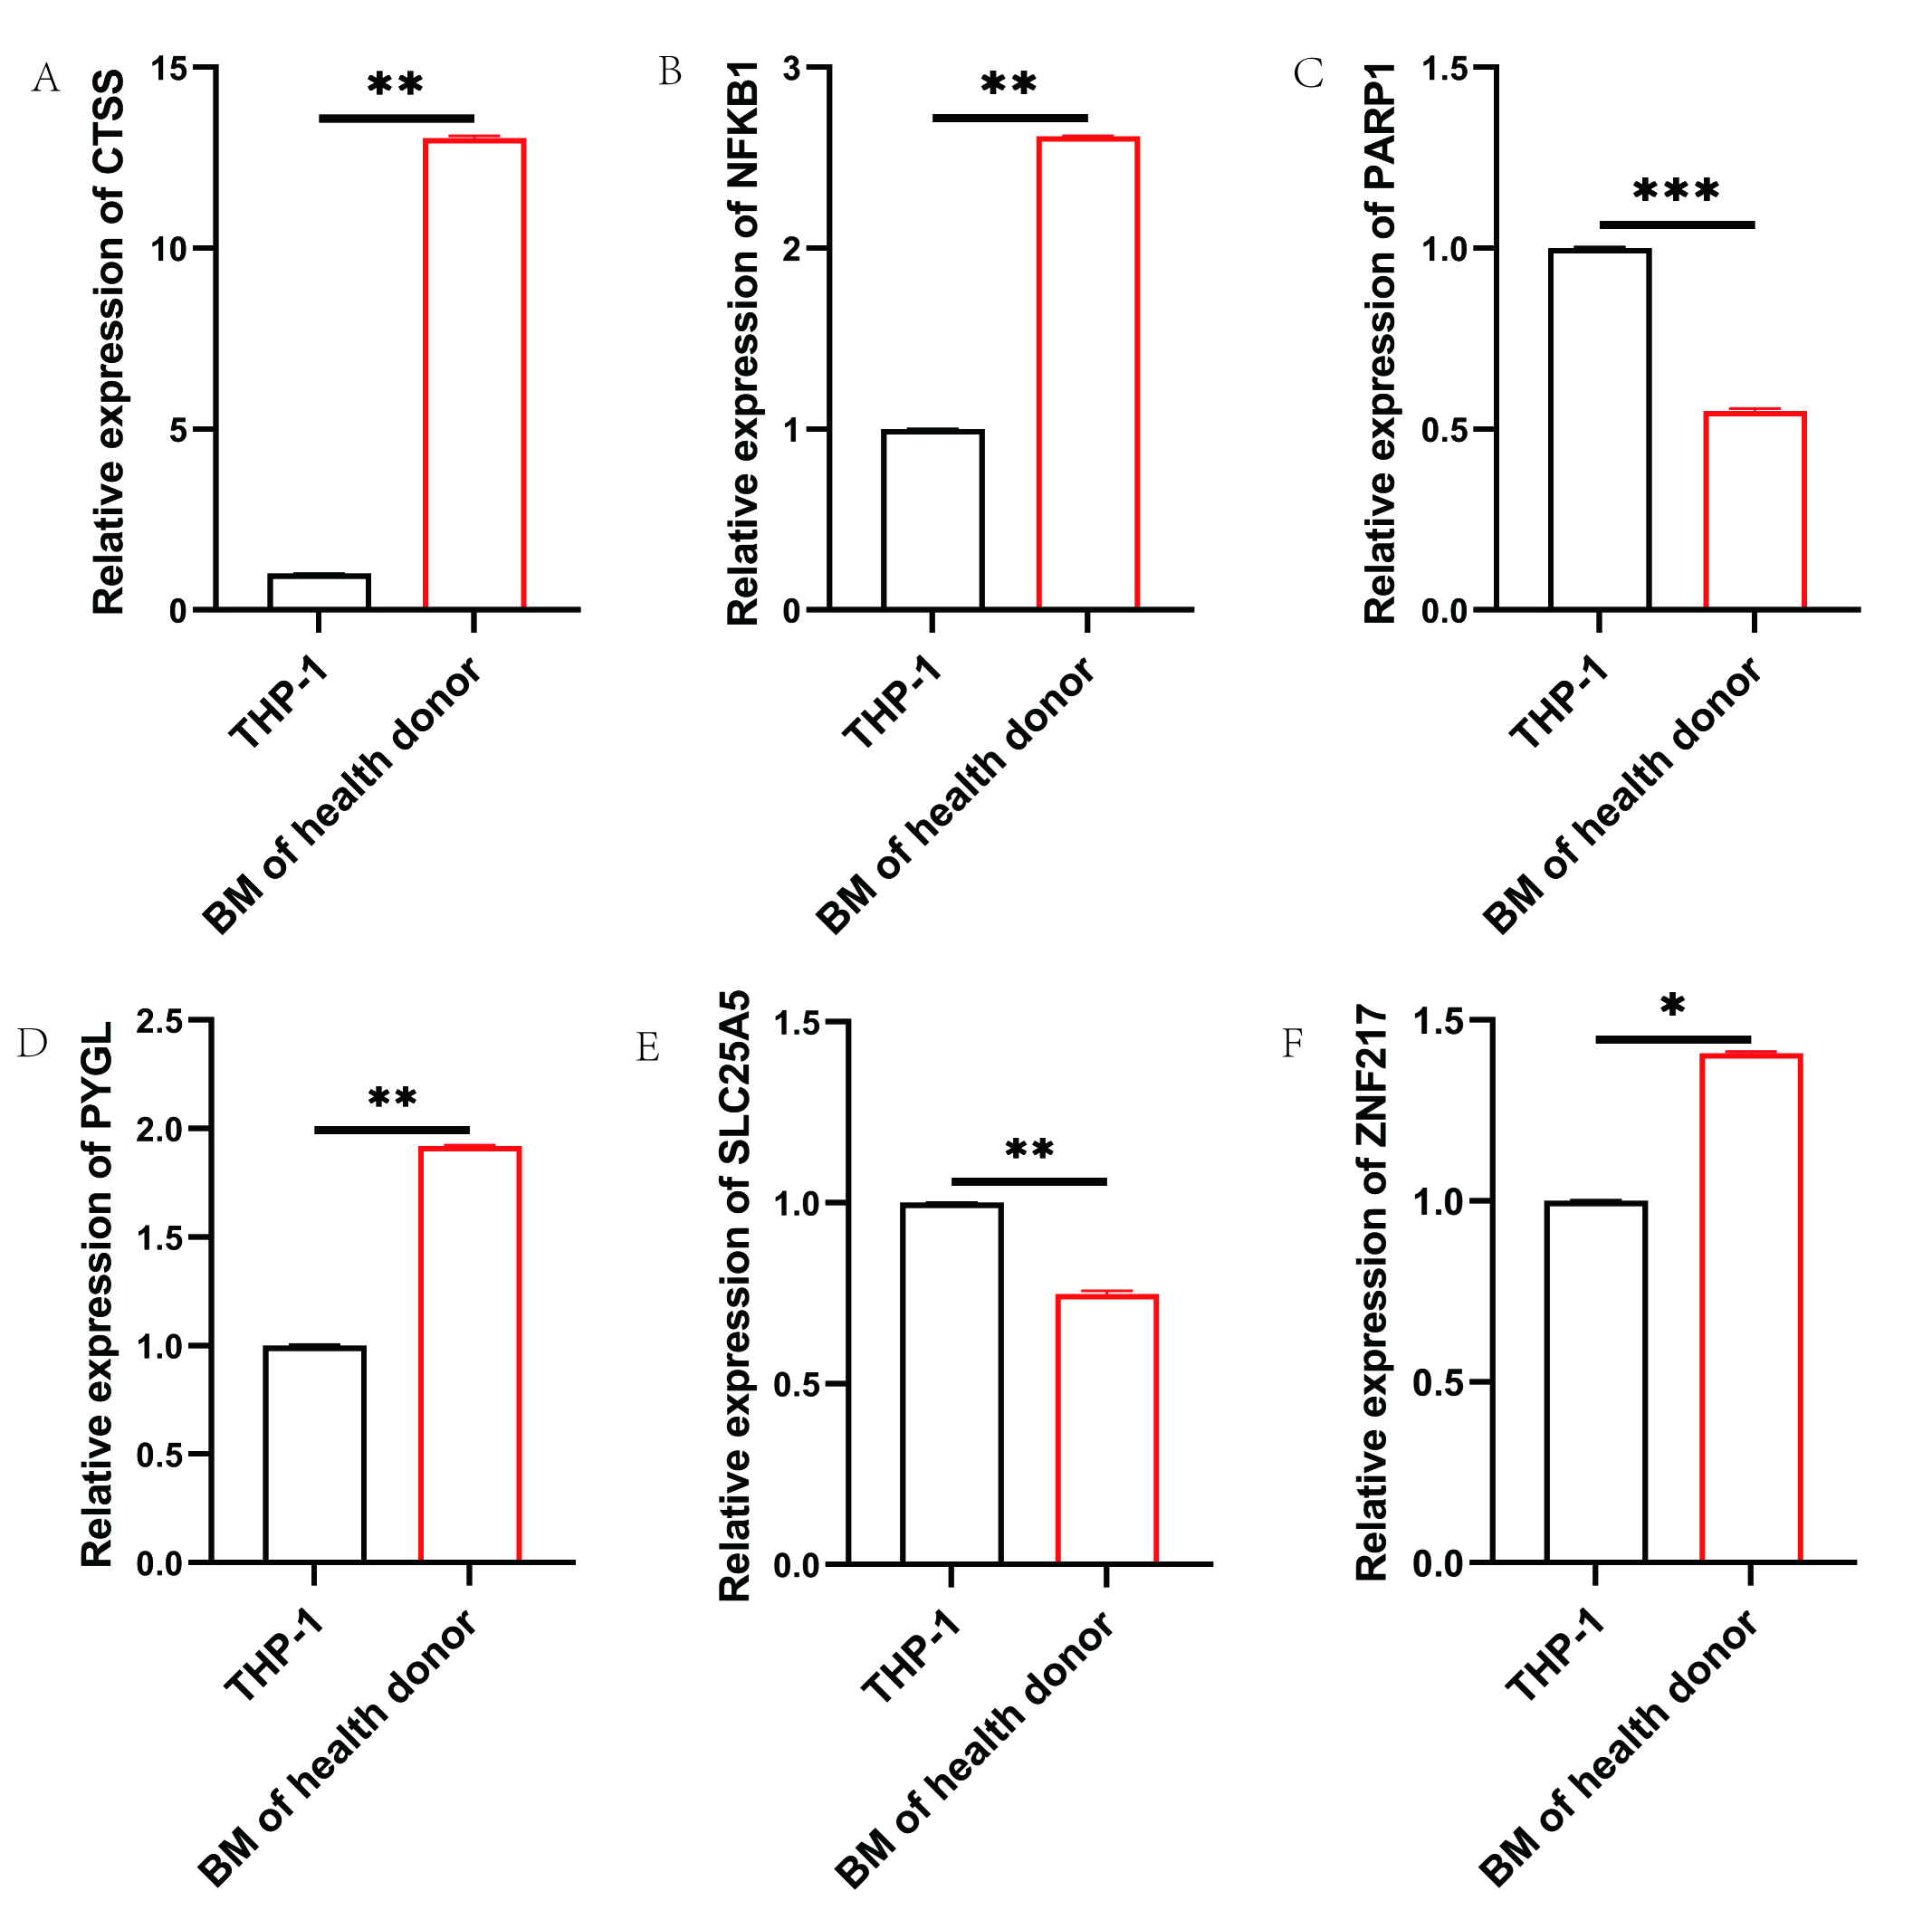


**Figure S2. Expression level of 6 hub-NRDEGs in Human Acute Monocytic Leukemia Cells (THP-1) and BM-MNCs of health donor**

**A-F.** Relative expression levels of *CTSS* **(A)**,*NFKB1* **(B)**, *PARP-1* **(C)**, *PYGL* **(D)**, *SLC25A5* **(E)** and *ZNF217* **(F)** in AML cell line (THP-1) and BM-MNCs of health donors.mRNA levels were normalized to GAPDH and expressed as the fold change. symbol ***** equal to P < 0.05 was significant; symbol ****** equal to P < 0.01 was highly significant.

### 2.3 KEGG pathway maps of APOPTOSIS and NECROPTOSIS

###
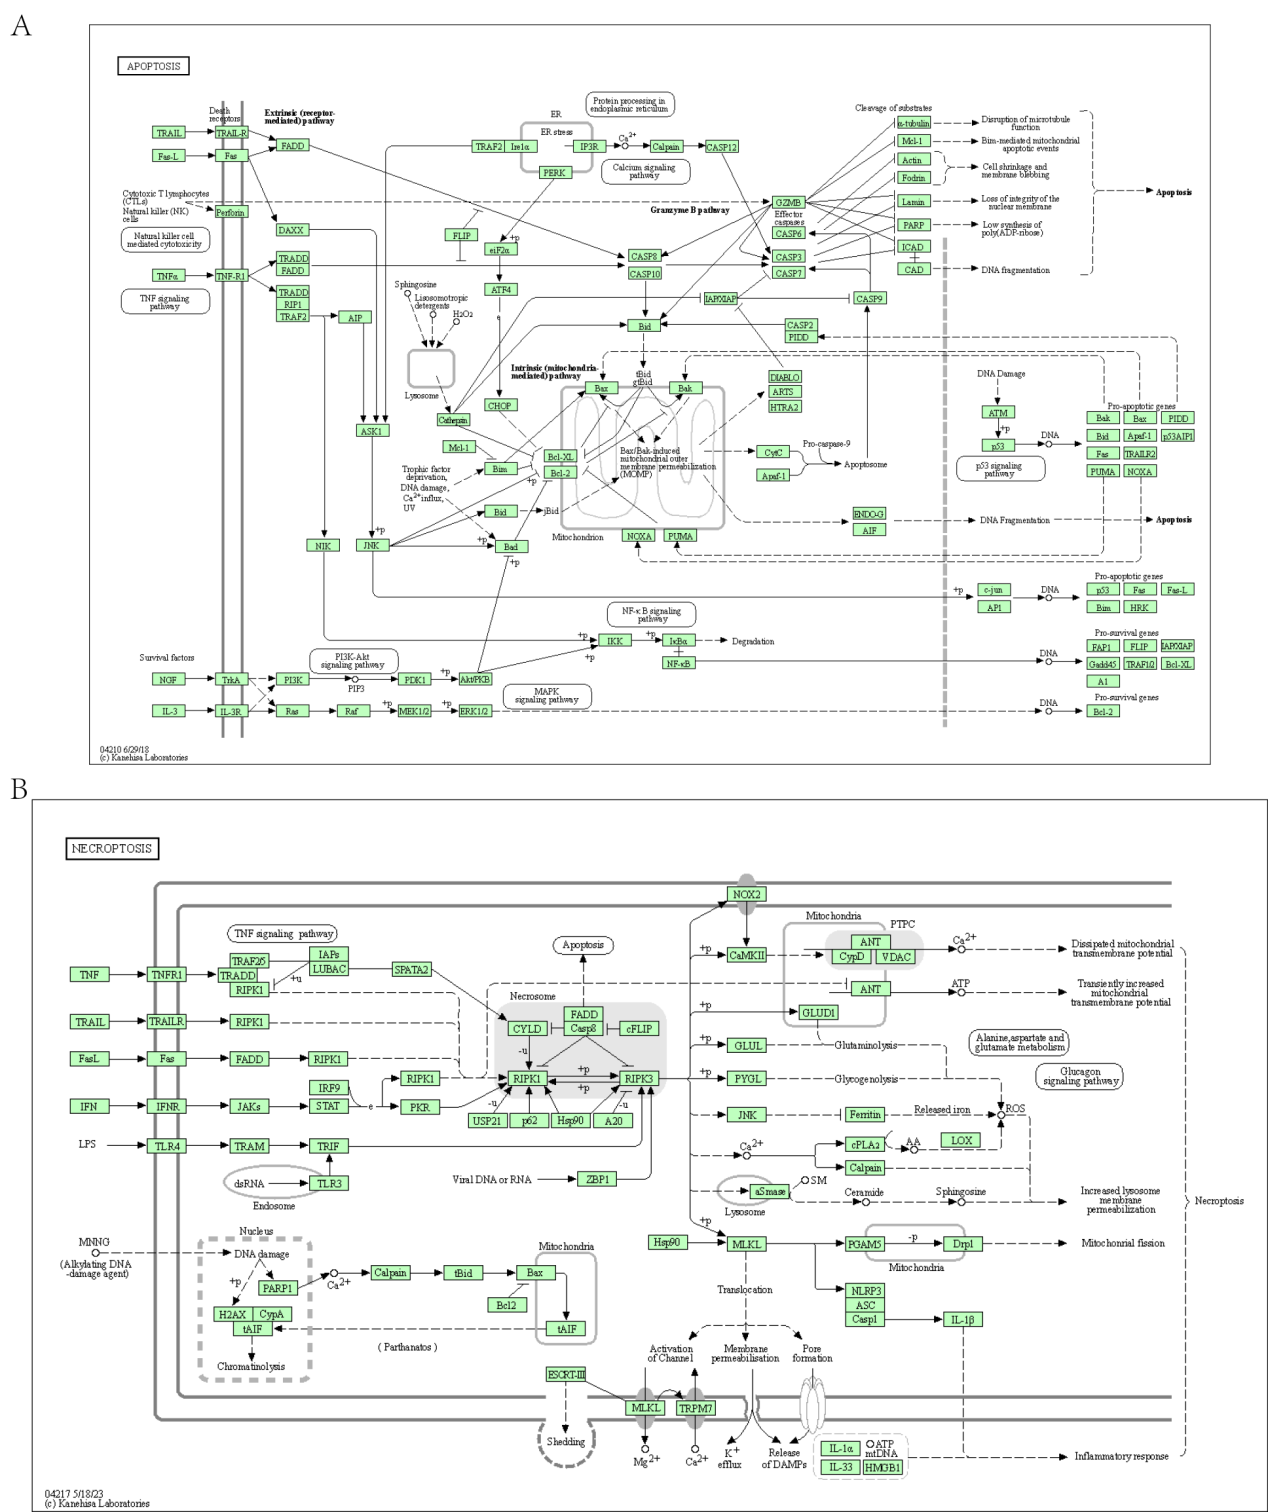


**Figure S3. KEGG Pathway maps**

**A．**Pathway map Apoptosis(hsa04210) **B.** Pathway map Necroptosis(hsa04217)

### 2.4 Calibration curve revealed the accuracy of the LASSO model

We used R package rms to estimates of predicted vs. observed values and the calibration curve showed a strong consistency between the predicted value and the actual observed value with Brier scores of 0.000 and Slope value of 0.43, indicating the LASSO regression model has high accuracy(supplementary Figure S4).

###
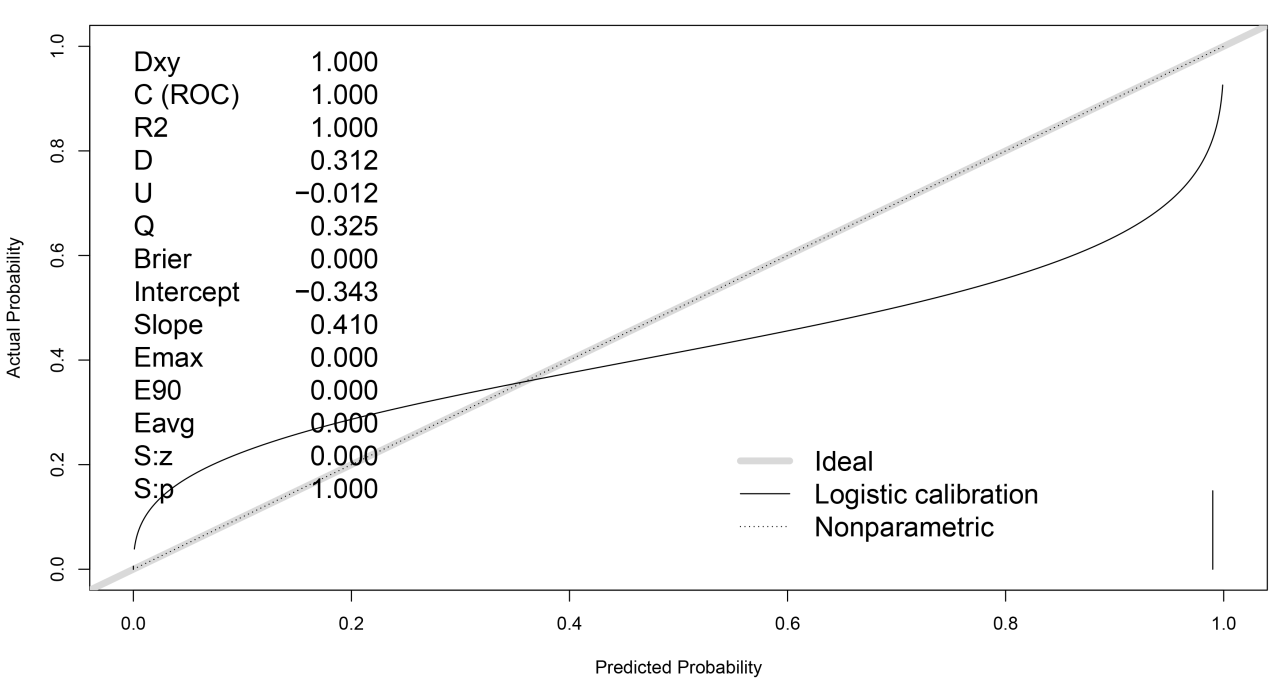


**Figure S4.** **Calibration curve of the predictive model**

Calibration curve showed the degree of consistency between the predicted probability and actual probability. The closer the slope was to 1, the better the accuracy of the model prediction, and the bier index <0.25 indicated the model has good accuracy of prediction.

### 2.5 mRNA-miRNA , mRNA-TF interaction networks of Hub-NRDEGs

The miRNAs interacting with 6 hub-NRDEGs were predicted using the miRDB database and factors in gene transcription that have interactions with the 6 hub-NRDEGs were downloaded from CHIPBase and hTFtarget databases. Based on the mRNA-miRNA interaction network analysis, 65 miRNA molecules were comprised within the mRNA-miRNA interaction networks with the 6 hub-NRDEGs, forming 65 pairs of interaction relationships in total. (table.6). After intersecting the downloaded data from CHIPBase and hTFtarget databases, we finally obtained the interaction relationship data of 6 hub-NRDEGs with 80 TFs. (table.7) The mRNA-miRNAs (Figure.S5A) and mRNA-TFs(Figure. S5 B) interaction networks were sketched and displayed. The rectangular blocks filled green represent mRNAs; the purple blocks filled oval represent TFs. *ZNF217* displayed the maximum interactions with and simultaneously targeting 45 transcription factors in the mRNA-TF interaction networks.


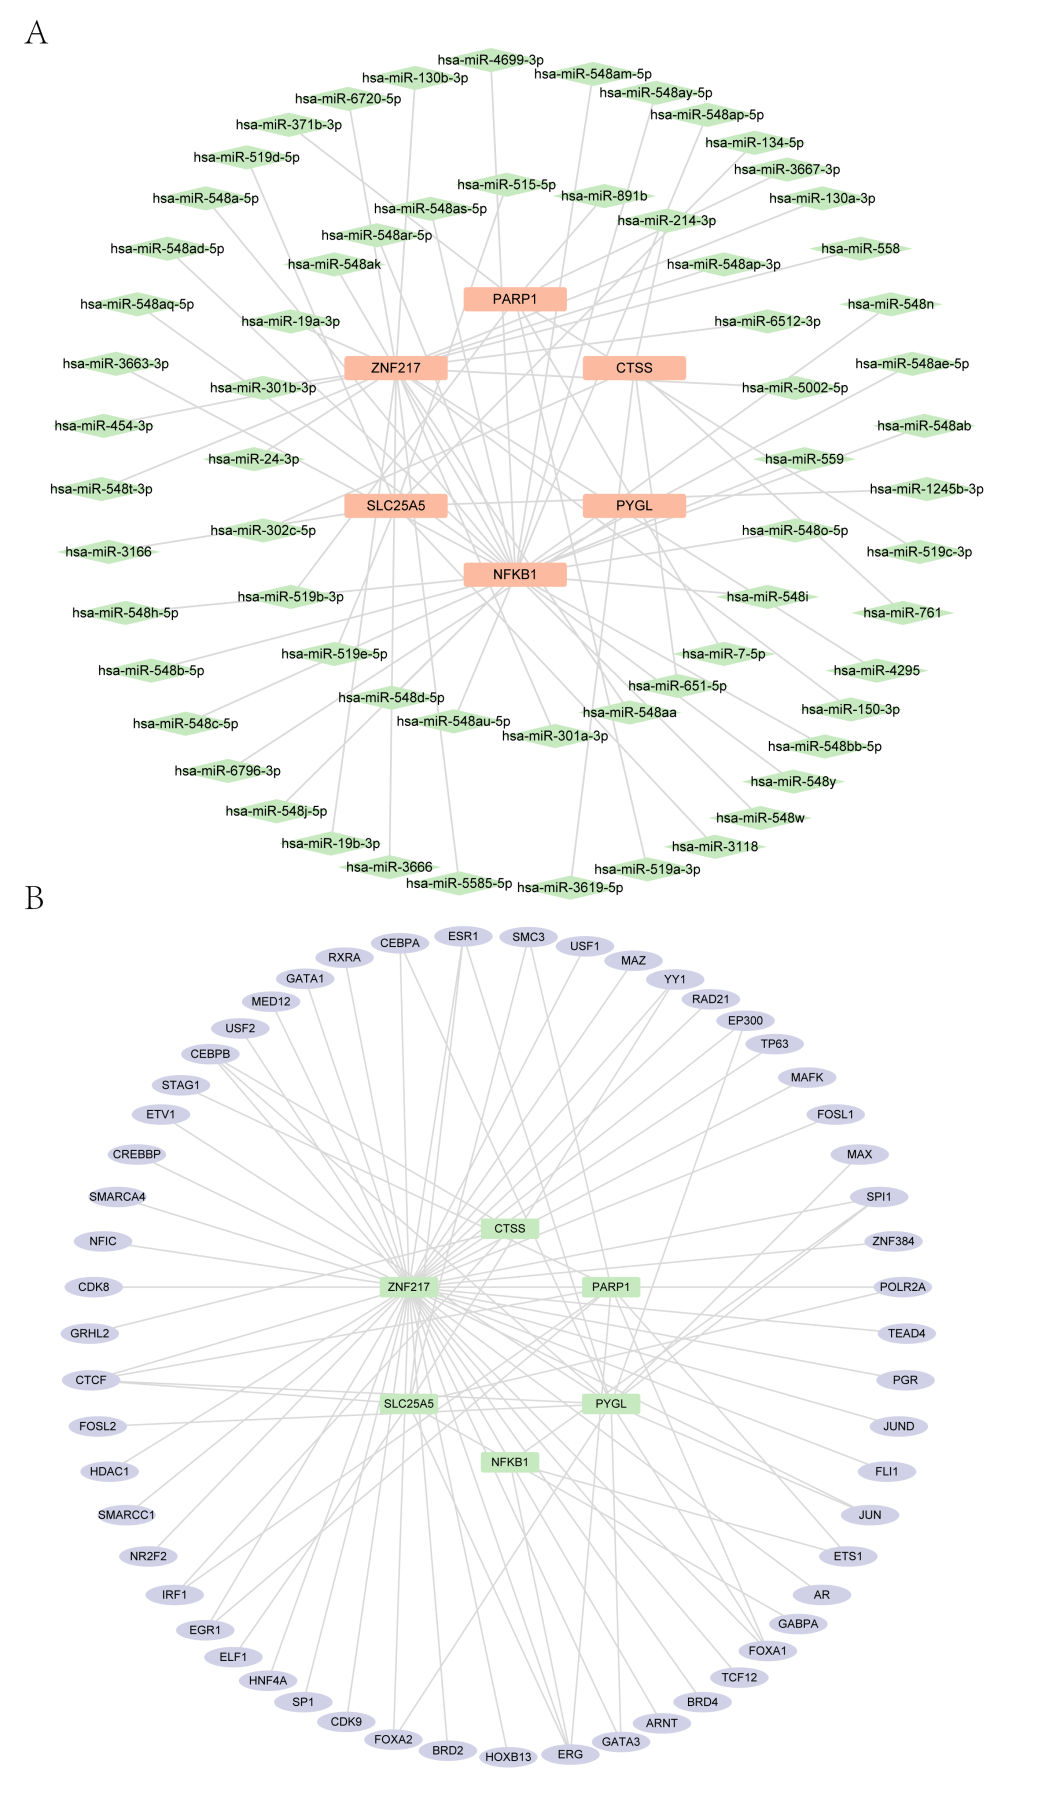


**Figure S5.** **mRNA-miRNA, mRNA-TF interaction networks**

**A.** The mRNA-miRNA interaction networks of hub-NRDEGs with miRNAs. Orange rectangles represent mRNAs. Green diamond blocks represent miRNAs. **B.** The mRNA-TF interaction networks of hub-NRDEGs with TFs, Green rectangles represent mRNAs. The purple oval blocks represent TFs.

## Tables

### Table 1：GEO Microarray Chip Information

|  | GSE7186 | GSE23143 | GSE84334 |
| --- | --- | --- | --- |
| Platform | GPL4861 | GPL8653 | GPL570 |
| Species | Homo sapiens | Homo sapiens | Homo sapiens |
| Tissue | Bone Marrow | Bone Marrow | Bone Marrow |
| Samples in DFU group | 23 | 87 | 45 |
| Samples in Normal group | 6 |  |  |
| Reference |  |  |  |

AML，Acute myeloid leukemia；GEO，Gene Expression Omnibus

### Table 2.List of gene symbol of NRGs

| **Table 2.List of gene symbol of NRGs** | | | | | | |
| --- | --- | --- | --- | --- | --- | --- |
| SPATA2L | H2AB2 | AXL | OGT | PRDX1 | AGO2 | HNRNPM |
| CYBB | PPIA | MERTK | ID1 | PTPN6 | AP2B1 | IGF2BP1 |
| CAMK2A | FADD | TYRO3 | CTSD | STXBP1 | AP2S1 | KHDRBS1 |
| CAMK2D | FAS | SIRT6 | CLEC7A | TNFRSF1B | CALU | MAP1LC3A |
| CAMK2B | FASLG | SLC39A7 | TRIM28 | TSC2 | CNBP | MVP |
| CAMK2G | MLKL | NAT2 | TP63 | YWHAE | COPA | MYL6 |
| SLC25A4 | RIPK1 | USP22 | PADI4 | ATP2A1 | CUL4A | PSMC4 |
| SLC25A31 | RIPK3 | CGAS | HPRT1 | CUL3 | EEF1A1 | RBM14 |
| PPID | TLR3 | PANX1 | FAP | DDX3X | GBE1 | RIOK1 |
| VDAC1 | TNF | NAT1 | TRIM24 | EEF2 | HNRNPU | RPL13A |
| VDAC3 | TNFRSF1A | PDCD6IP | CHL1 | HSPD1 | KRT10 | RPL23 |
| GLUD2 | TRADD | FLOT2 | TGFBR1 | LEF1 | KRT16 | RPL23A |
| GLUD1 | TRAF2 | FLOT1 | CDKN2A | NOD2 | LGALS1 | RPL34 |
| GLUL | TRAF5 | IL37 | SNCA | RPL11 | LITAF | RPLP2 |
| PYGL | BIRC2 | FASN | CDK1 | RPL5 | NDUFA4 | SF1 |
| PYGB | BIRC3 | HNRNPA1 | RIGI | RPS19 | NSUN2 | SRSF3 |
| MAPK10 | XIAP | CDK9 | ACVR1B | TPM1 | OPTN | SRSF6 |
| MAPK9 | RBCK1 | SIRPA | TARDBP | TUBB4A | PLEC | SRSF7 |
| FTH1 | RNF31 | TIMM50 | CCL2 | YWHAG | PPM1B | TPM4 |
| FTL | SHARPIN | SLC25A37 | DPEP1 | AHR | RBMX | TRA2B |
| PLA2G4E | SPATA2 | PPP1R3G | XRCC1 | BAP1 | RPL13 | WDR77 |
| PLA2G4A | CYLD | DIABLO | UBR2 | HSPA9 | RPL26 | YBX1 |
| JMJD7-PLA2G4B | CASP8 | NFKBIA | HIF1A | MAPKAPK2 | RPL27 | ADRM1 |
| PLA2G4B | CFLAR | AURKC | TBK1 | PARK7 | RPS17 | ALYREF |
| PLA2G4C | SLC25A5 | NGFR | GPX4 | PRPS1 | RPS20 | ANO10 |
| PLA2G4D | SLC25A6 | FMR1 | LAMP2 | SLC16A1 | RPS24 | ATP5F1C |
| PLA2G4F | VDAC2 | GNLY | MPRIP | TNNT2 | RPS26 | ATXN2L |
| ALOX15 | PYGM | HTRA2 | MTOR | TUBA4A | RPS27 | CEP170 |
| CAPN1 | MAPK8 | HSPA5 | BRAF | ARHGEF2 | RPS3 | CLINT1 |
| CAPN2 | PGAM5 | PRKAA2 | AFP | CASP4 | RPS6 | DNAJA2 |
| SMPD1 | DNM1L | PRKAA1 | ACHE | CASP9 | SFPQ | H1-2 |
| IL1B | NLRP3 | PITPNA | CXCL1 | CLTC | SLC25A10 | HNRNPH3 |
| CHMP2A | PYCARD | ANGPT2 | NFAT5 | EIF4EBP1 | SLC30A9 | HOOK1 |
| CHMP2B | CASP1 | METTL3 | VIL1 | HSPA1A | STK38 | HSPA1B |
| CHMP3 | CHMP4B | FNDC4 | MAPK1 | IL4 | SVIL | KRT86 |
| RNF103-CHMP3 | CHMP1A | FNDC5 | CBL | KRT1 | TANK | LARP1 |
| CHMP4A | TRPM7 | PRKN | GSN | KRT14 | TCP1 | LRRFIP2 |
| CHMP4C | IL1A | RALBP1 | CTSL | KRT8 | TNFRSF8 | MPP1 |
| CHMP6 | HMGB1 | TXN | RARG | LRP1 | TUBB6 | MYL12A |
| VPS4B | TNFSF10 | TP53I3 | CTSH | PINK1 | XRN2 | MYL6B |
| VPS4A | TNFRSF10A | GSDMD | CTSS | PPP1CB | BANF1 | MYO1B |
| CHMP1B | TNFRSF10B | STUB1 | DSTYK | RANBP2 | BNIP3L | PDIA6 |
| CHMP5 | IFNB1 | CDC37 | TNFRSF25 | RIPK2 | IVNS1ABP | PLEKHA5 |
| CHMP7 | IFNG | ZFP91 | BRAP | SLC25A13 | KRT9 | RCC2 |
| IL33 | JAK1 | RELA | BNIP3 | TPM2 | MYO1C | RFWD3 |
| FAF1 | STAT3 | ADAM17 | SYVN1 | TPM3 | PABPC1 | RPL28 |
| IFNA1 | TLR4 | TRPC6 | CHUK | TRAF3 | PDLIM7 | RPL29 |
| IFNA2 | TICAM1 | CASP10 | BUB1B | AFG3L2 | PNKD | RPL6 |
| IFNA4 | ZBP1 | SIRT5 | BDNF | ASIC1 | PRPF8 | RPL9 |
| IFNA5 | SQSTM1 | MTX2 | HSPA8 | ATF4 | RPL3 | RPLP1 |
| IFNA6 | HSP90AA1 | MTX1 | IRAK1 | CCT5 | RPS12 | SCYL2 |
| IFNA7 | HSP90AB1 | IAH1 | MAPK3 | DDX5 | RPS14 | SYNCRIP |
| IFNA8 | TNFAIP3 | AURKA | EIF2AK3 | EMD | RPS29 | TMEM165 |
| IFNA10 | PARP1 | PLK1 | IKBKG | HNRNPA2B1 | CAPZA1 | TNRC6B |
| IFNA13 | BID | MYH9 | NQO1 | HPSE | CCNT1 | TRA2A |
| IFNA14 | BAX | SOAT1 | TAB2 | KRT5 | CCT3 | TRIP6 |
| IFNA16 | AIFM1 | OTULIN | CALM1 | LGALS3 | CPSF3 | TWF1 |
| IFNA17 | H2AC12 | HGF | BECN1 | LTBP1 | DYNLL1 | TXNIP |
| IFNA21 | BCL2 | SRC | CALM2 | MYH14 | EIF4B | COPS2 |
| IFNAR1 | MAP3K7 | KL | FLNC | NFS1 | HNRNPH1 | CPSF6 |
| IFNAR2 | ITPK1 | MIF | IKBKE | NUP214 | IGF2BP3 | GCC2 |
| IFNGR1 | IPMK | ANXA1 | XBP1 | PABPN1 | IL24 | GSDME |
| IFNGR2 | CASP6 | BCL2L1 | CALM3 | PFKL | IQSEC1 | MRPS12 |
| JAK2 | PELI1 | FPR1 | HSPA4 | PRSS1 | KRT2 | MYCBP |
| JAK3 | PGLYRP1 | CASP2 | TAB1 | PSMA3 | KRT7 | MYO1D |
| TYK2 | SIRT3 | TNFRSF21 | UBC | S100A4 | NME8 | PKP3 |
| STAT1 | STING1 | OPA1 | SOX17 | SLC25A1 | PAWR | PREB |
| STAT2 | TNIP1 | BMI1 | EIF2A | TET2 | PCBP1 | RPL17 |
| STAT4 | MEFV | UBE2H | AGFG1 | TUBB4B | PCM1 | RPS18 |
| STAT5A | AIM2 | BBC3 | H1-5 | TUFM | PDIA4 | RPS4X |
| STAT5B | TP53 | AVEN | TAB3 | UBE2D3 | RNGTT | RPS8 |
| STAT6 | UCHL1 | ZNF7 | TNIP2 | UBE2L3 | RPL10A | SRSF4 |
| IRF9 | SERTAD1 | TRIM72 | MIB2 | UGDH | RPL12 | ZFP36 |
| EIF2AK2 | NFKB1 | KIAA1191 | AHRR | ULK1 | RPL22 | AMBRA1 |
| TICAM2 | KLHDC10 | PAK1 | DIRAS3 | XRCC6 | RPL4 | CARD6 |
| USP21 | SFTPA1 | CYP3A4 | C20orf204 | ACTC1 | RPL7 | CDC42BPG |
| H2AX | CTSB | SGK1 | EGFR | AHSG | RPL7A | CPSF2 |
| H2AC20 | MAPK14 | CDC7 | FLT3 | CADM1 | RPS13 | ESYT2 |
| H2AC1 | GSK3B | IDO1 | IDH1 | COPB2 | RPS16 | FAF2 |
| H2AW | ADAR | CERK | IDH2 | ELP1 | RPS23 | G3BP2 |
| H2AB3 | MYC | SMN1 | HMOX1 | FLII | S100A6 | GOSR1 |
| H2AC8 | TNIP3 | SMN2 | NPM1 | FUS | SNRPE | HELQ |
| H2AC4 | GJB1 | PTEN | VIM | IRF3 | SRSF1 | LACTB |
| MACROH2A2 | PTGES3 | ESR2 | EPAS1 | KLF6 | SRSF9 | POF1B |
| MACROH2A1 | UVRAG | GSK3A | G6PD | KRT19 | SSBP1 | PRPF40A |
| H2AC19 | MYD88 | C5 | GJA1 | KRT6A | TCOF1 | RAI14 |
| H2AJ | BRD4 | ATG5 | KRT18 | MAP1B | TUBA1C | RBM25 |
| H2AB1 | JUN | EGR1 | MMP13 | MYO5A | ADAMTSL4 | RPL38 |
| H2AC17 | RB1 | SP1 | RARA | MYO6 | ATAD3A | RPS25 |
| H2AC18 | PPP6C | C9 | VCP | NCL | BAG2 | SNRPF |
| H2AC11 | SIRT2 | CD74 | ACTB | NRIP1 | BCLAF1 | SRRM2 |
| H2AC21 | IKBKB | C6 | APC | PKP2 | CAPN7 | THRAP3 |
| H2AZ2 | DAPK1 | C7 | CAD | RAD23B | CCT6A | TMOD3 |
| H2AC7 | FKBP1A | NOX4 | CASP3 | RPL15 | CCT8 | WRNIP1 |
| H2AZ1 | CD274 | RCN1 | CASP7 | RPL35 | DDX17 | YTHDC1 |
| H2AC15 | EZH2 | AIFM2 | DRD2 | RPS10 | DNAJA1 | ZC3HAV1 |
| H2AC6 | NFE2L2 | MKRN1 | KEAP1 | S100A10 | ELAVL1 | ZNF217 |
| H2AC13 | TRAF6 | TNFSF12 | KIF11 | SKP2 | FIP1L1 | ZNF24 |
| H2AC14 | CXCL5 | UHRF1 | PIKFYVE | TUBA1B | HNRNPF | CALML5 |
| H2AC16 | AREL1 | CD40LG | PKM | XRCC5 | HNRNPL | CHCHD4 |
| CRTAM | MGA | SRSF10 | HRNR | ZSCAN20 | PGAM4 | LZTS3 |
| DCD | MLF2 | TANC2 | HSPBAP1 | AKAP8L | RPL39 | MAIP1 |
| ERH | NUDT21 | TRAFD1 | KCTD5 | PPP1R12C | SP6 | OBI1 |
| GLTP | OTUD4 | VBP1 | LRRC59 | UTP11 | TMEM44 | TMEM263 |
| GOLGA3 | PNN | ZNF146 | SERBP1 | APOOL | UBAP2 | ZAN |
| GTF3C3 | RPS27L | AKNA | TLE6 | CEP44 | CTAG2 | ZNF391 |
| HEMGN | SEC16A | CHTOP | UBL4A | OTUD1 | H1-10 | RHOXF2 |
| LIMCH1 | SRP14 | FAM83D | ZKSCAN4 | PALMD | H2BC12 | RBM14-RBM4 |

### Table 3. List of imprinted genes and oligonucleotide primers for RT-qPCR

| Gene | sequences of primers(5’-->3’) |
| --- | --- |
| CTSS | **F:** TCACCACTGGCATCTCTGGA |
|  | **R:** CACTTCTTCACTGGTCATGTCTC |
| NFKB1 | **F:** GCAGCTGGGAGATCGGGAA |
|  | **R:** GCTGTAAACATGAGCCGCAC |
| PARP-1 | **F:** CGAGTCGAGTACGCCAAGAG |
|  | **R:** CATCAAACATGGGCGACTGC |
| PYGL | **F:** AAGAGTTTCAACCGGCACCT |
|  | **R:** CAAGCTTGGGGCACTTGTC |
| SLC25A5 | **F:** CAGGGCGCAAAGGAACTGAC |
|  | **R:** CACCCATGCCTCTGAGAACA |
| ZNF217 | **F:** TCTCAGAACGCATACAGGTGAA |
|  | **R:** ACTTCAGCAGCAACATCGGT |
| GAPDH | **F:** CTGGCCAAGGTCATCCATGAC |
|  | **R:** CTTGCCCACAGCCTTGGCAG |

**F, forward; R, reverse**

### Table 4：GO and KEGG enrichment analysis results

| ONTOLOGY | ID | Description | BgRatio | pvalue | p.adjust | qvalue |
| --- | --- | --- | --- | --- | --- | --- |
| CC | GO:0034774 | secretory granule lumen | 322/19550 | 0.000872122 | 0.009301671 | 0.005375579 |
| CC | GO:0060205 | cytoplasmic vesicle lumen | 325/19550 | 0.000895869 | 0.009301671 | 0.005375579 |
| CC | GO:0031983 | vesicle lumen | 327/19550 | 0.000911929 | 0.009301671 | 0.005375579 |
| CC | GO:0005667 | transcription regulator complex | 413/19550 | 0.001786568 | 0.014213244 | 0.008214052 |
| CC | GO:1904724 | tertiary granule lumen | 55/19550 | 0.000503708 | 0.009301671 | 0.005375579 |
| CC | GO:0035580 | specific granule lumen | 62/19550 | 0.000639893 | 0.009301671 | 0.005375579 |
| CC | GO:1904813 | ficolin-1-rich granule lumen | 124/19550 | 0.002526572 | 0.014213244 | 0.008214052 |
| CC | GO:0033256 | I-kappaB/NF-kappaB complex | 4/19550 | 0.002453171 | 0.014213244 | 0.008214052 |
| CC | GO:0035976 | transcription factor AP-1 complex | 4/19550 | 0.002453171 | 0.014213244 | 0.008214052 |
| CC | GO:0036021 | endolysosome lumen | 5/19550 | 0.003065602 | 0.014213244 | 0.008214052 |
| MF | GO:0001227 | DNA-binding transcription repressor activity, RNA polymerase II-specific | 310/18368 | 0.00093546 | 0.020762821 | 0.008865951 |
| MF | GO:0001217 | DNA-binding transcription repressor activity | 313/18368 | 0.000961905 | 0.020762821 | 0.008865951 |
| MF | GO:0070412 | R-SMAD binding | 23/18368 | 9.82E-05 | 0.010413321 | 0.004446602 |
| MF | GO:0046332 | SMAD binding | 79/18368 | 0.001172268 | 0.020762821 | 0.008865951 |
| MF | GO:0015207 | adenine transmembrane transporter activity | 2/18368 | 0.001306229 | 0.020762821 | 0.008865951 |
| MF | GO:0002060 | purine nucleobase binding | 3/18368 | 0.001958757 | 0.020762821 | 0.008865951 |
| MF | GO:0008184 | glycogen phosphorylase activity | 3/18368 | 0.001958757 | 0.020762821 | 0.008865951 |
| MF | GO:0102250 | linear malto-oligosaccharide phosphorylase activity | 3/18368 | 0.001958757 | 0.020762821 | 0.008865951 |
| MF | GO:0102499 | SHG alpha-glucan phosphorylase activity | 3/18368 | 0.001958757 | 0.020762821 | 0.008865951 |
| MF | GO:0140294 | NAD DNA ADP-ribosyltransferase activity | 3/18368 | 0.001958757 | 0.020762821 | 0.008865951 |
| KEGG | hsa04210 | Apoptosis | 136/8160 | 4.91E-06 | 0.000530012 | 0.000237627 |
| KEGG | hsa05120 | Epithelial cell signaling in Helicobacter pylori infection | 70/8160 | 3.28E-05 | 0.001773034 | 0.000794928 |
| KEGG | hsa04657 | IL-17 signaling pathway | 94/8160 | 7.95E-05 | 0.002862531 | 0.001283396 |
| KEGG | hsa04064 | NF-kappa B signaling pathway | 104/8160 | 0.000107525 | 0.002896128 | 0.001298459 |
| KEGG | hsa04668 | TNF signaling pathway | 112/8160 | 0.00013408 | 0.002896128 | 0.001298459 |
| KEGG | hsa04217 | Necroptosis | 159/8160 | 0.000378368 | 0.006810624 | 0.003053496 |
| KEGG | hsa04621 | NOD-like receptor signaling pathway | 184/8160 | 0.000581101 | 0.00785893 | 0.003523497 |
| KEGG | hsa05167 | Kaposi sarcoma-associated herpesvirus infection | 194/8160 | 0.000678499 | 0.00785893 | 0.003523497 |
| KEGG | hsa05130 | Pathogenic Escherichia coli infection | 197/8160 | 0.000709642 | 0.00785893 | 0.003523497 |
| KEGG | hsa05415 | Diabetic cardiomyopathy | 203/8160 | 0.000774661 | 0.00785893 | 0.003523497 |
| KEGG | hsa05417 | Lipid and atherosclerosis | 215/8160 | 0.000915947 | 0.00785893 | 0.003523497 |
| KEGG | hsa05030 | Cocaine addiction | 49/8160 | 0.000966608 | 0.00785893 | 0.003523497 |
| KEGG | hsa05166 | Human T-cell leukemia virus 1 infection | 222/8160 | 0.001005514 | 0.00785893 | 0.003523497 |
| KEGG | hsa05208 | Chemical carcinogenesis - reactive oxygen species | 223/8160 | 0.00101875 | 0.00785893 | 0.003523497 |
| KEGG | hsa05134 | Legionellosis | 57/8160 | 0.001306681 | 0.009408103 | 0.004218058 |
| KEGG | hsa05132 | Salmonella infection | 249/8160 | 0.00140311 | 0.009470992 | 0.004246254 |
| KEGG | hsa05321 | Inflammatory bowel disease | 65/8160 | 0.001696262 | 0.010776256 | 0.00483146 |
| KEGG | hsa05133 | Pertussis | 76/8160 | 0.002311675 | 0.013483822 | 0.006045378 |
| KEGG | hsa05140 | Leishmaniasis | 77/8160 | 0.002372154 | 0.013483822 | 0.006045378 |
| KEGG | hsa04662 | B cell receptor signaling pathway | 82/8160 | 0.002685777 | 0.014503196 | 0.006502408 |

GO：Gene Ontology。MF：molecular function。CC：cellular component。KEGG：Kyoto Encyclopedia of Genes and Genomes。

### Table 5：GSEA enrichment analysis results.

| ID | setSize | enrichmentScore | NES | pvalue | p.adjust | qvalues |
| --- | --- | --- | --- | --- | --- | --- |
| MANALO_HYPOXIA_DN | 113 | 0.49282388 | 2.324068091 | 1.31E-09 | 3.10E-07 | 2.49E-07 |
| REACTOME_TP53_REGULATES_TRANSCRIPTION_OF_DNA_REPAIR_GENES | 26 | 0.536091636 | 1.87486776 | 0.002559257 | 0.030946205 | 0.024902418 |
| HAMAI_APOPTOSIS_VIA_TRAIL_UP | 236 | -0.291671151 | -1.470404686 | 0.001879338 | 0.025621893 | 0.020617944 |
| VERHAAK_AML_WITH_NPM1_MUTATED_UP | 50 | -0.431356149 | -1.679643788 | 0.003623757 | 0.0396182 | 0.031880775 |
| KEGG_MAPK_SIGNALING_PATHWAY | 72 | -0.403403554 | -1.703482929 | 0.001353062 | 0.0202035 | 0.016257761 |
| PEREZ_TP53_TARGETS | 236 | -0.338919958 | -1.70860057 | 1.93E-05 | 0.000813624 | 0.000654724 |
| KEGG_JAK_STAT_SIGNALING_PATHWAY | 38 | -0.478023959 | -1.732400947 | 0.002711775 | 0.032333432 | 0.02601872 |
| ZHENG_IL22_SIGNALING_UP | 11 | -0.761960752 | -2.023957056 | 0.000453459 | 0.009181883 | 0.007388664 |
| ROSS_AML_WITH_PML_RARA_FUSION | 28 | 0.656451741 | 2.180725094 | 3.02E-05 | 0.000543161 | 0.000390633 |
| ROSS_AML_OF_FAB_M7_TYPE | 27 | 0.628640932 | 2.067746135 | 0.000178951 | 0.002195387 | 0.00157889 |
| ALCALAY_AML_BY_NPM1_LOCALIZATION_UP | 33 | 0.588768884 | 2.047120167 | 0.000125592 | 0.001703117 | 0.001224857 |
| VERHAAK_AML_WITH_NPM1_MUTATED_DN | 78 | -0.471999746 | -1.696940522 | 0.003002154 | 0.020223173 | 0.014544212 |

GSEA：Gene Set Enrichment Analysis

### Table 6. List of miRNA related hub genes

| mRNA | miRNA |
| --- | --- |
| CTSS | hsa-miR-651-5p |
| CTSS | hsa-miR-214-3p |
| CTSS | hsa-miR-302c-5p |
| CTSS | hsa-miR-3619-5p |
| CTSS | hsa-miR-761 |
| NFKB1 | hsa-miR-548ap-5p |
| NFKB1 | hsa-miR-548a-5p |
| NFKB1 | hsa-miR-548h-5p |
| NFKB1 | hsa-miR-548i |
| NFKB1 | hsa-miR-548as-5p |
| NFKB1 | hsa-miR-548d-5p |
| NFKB1 | hsa-miR-548w |
| NFKB1 | hsa-miR-548ab |
| NFKB1 | hsa-miR-548ay-5p |
| NFKB1 | hsa-miR-548ad-5p |
| NFKB1 | hsa-miR-548b-5p |
| NFKB1 | hsa-miR-548o-5p |
| NFKB1 | hsa-miR-548ar-5p |
| NFKB1 | hsa-miR-548au-5p |
| NFKB1 | hsa-miR-548y |
| NFKB1 | hsa-miR-548ae-5p |
| NFKB1 | hsa-miR-548am-5p |
| NFKB1 | hsa-miR-548aq-5p |
| NFKB1 | hsa-miR-548c-5p |
| NFKB1 | hsa-miR-559 |
| NFKB1 | hsa-miR-548ak |
| NFKB1 | hsa-miR-548j-5p |
| NFKB1 | hsa-miR-548bb-5p |
| NFKB1 | hsa-miR-548n |
| NFKB1 | hsa-miR-4699-3p |
| NFKB1 | hsa-miR-3663-3p |
| PARP1 | hsa-miR-7-5p |
| PARP1 | hsa-miR-891b |
| PARP1 | hsa-miR-519b-3p |
| PARP1 | hsa-miR-519a-3p |
| PARP1 | hsa-miR-519c-3p |
| PARP1 | hsa-miR-3667-3p |
| PARP1 | hsa-miR-371b-3p |
| PYGL | hsa-miR-6796-3p |
| SLC25A5 | hsa-miR-515-5p |
| SLC25A5 | hsa-miR-519e-5p |
| SLC25A5 | hsa-miR-3118 |
| SLC25A5 | hsa-miR-1245b-3p |
| SLC25A5 | hsa-miR-134-5p |
| SLC25A5 | hsa-miR-519d-5p |
| SLC25A5 | hsa-miR-3166 |
| ZNF217 | hsa-miR-5002-5p |
| ZNF217 | hsa-miR-19a-3p |
| ZNF217 | hsa-miR-19b-3p |
| ZNF217 | hsa-miR-150-3p |
| ZNF217 | hsa-miR-558 |
| ZNF217 | hsa-miR-130b-3p |
| ZNF217 | hsa-miR-454-3p |
| ZNF217 | hsa-miR-301a-3p |
| ZNF217 | hsa-miR-6512-3p |
| ZNF217 | hsa-miR-301b-3p |
| ZNF217 | hsa-miR-3666 |
| ZNF217 | hsa-miR-4295 |
| ZNF217 | hsa-miR-130a-3p |
| ZNF217 | hsa-miR-6720-5p |
| ZNF217 | hsa-miR-548t-3p |
| ZNF217 | hsa-miR-548aa |
| ZNF217 | hsa-miR-548ap-3p |
| ZNF217 | hsa-miR-24-3p |
| ZNF217 | hsa-miR-5585-5p |

### Table 7. List of TF related hub genes

| mRNA | TF |
| --- | --- |
| CTSS | CEBPB |
| CTSS | GRHL2 |
| CTSS | IRF1 |
| NFKB1 | ERG |
| NFKB1 | ETS1 |
| NFKB1 | SPI1 |
| PARP1 | SMC3 |
| PARP1 | STAG1 |
| PARP1 | CTCF |
| PARP1 | EGR1 |
| PARP1 | ERG |
| PARP1 | ETS1 |
| PARP1 | FOXA1 |
| PARP1 | IRF1 |
| PYGL | EP300 |
| PYGL | ESR1 |
| PYGL | ETV1 |
| PYGL | FOSL2 |
| PYGL | FOXA1 |
| PYGL | FOXA2 |
| PYGL | GATA3 |
| PYGL | JUN |
| PYGL | MAX |
| PYGL | SPI1 |
| PYGL | CEBPA |
| PYGL | CEBPB |
| PYGL | CTCF |
| SLC25A5 | CTCF |
| SLC25A5 | ELF1 |
| SLC25A5 | ERG |
| SLC25A5 | ESR1 |
| SLC25A5 | GABPA |
| SLC25A5 | POLR2A |
| SLC25A5 | SMC3 |
| SLC25A5 | YY1 |
| ZNF217 | CREBBP |
| ZNF217 | CTCF |
| ZNF217 | EGR1 |
| ZNF217 | EP300 |
| ZNF217 | ERG |
| ZNF217 | ESR1 |
| ZNF217 | ARNT |
| ZNF217 | FLI1 |
| ZNF217 | FOSL1 |
| ZNF217 | FOXA1 |
| ZNF217 | FOXA2 |
| ZNF217 | GATA1 |
| ZNF217 | GATA3 |
| ZNF217 | HDAC1 |
| ZNF217 | HNF4A |
| ZNF217 | HOXB13 |
| ZNF217 | JUN |
| ZNF217 | JUND |
| ZNF217 | MAFK |
| ZNF217 | MAZ |
| ZNF217 | MED12 |
| ZNF217 | NFIC |
| ZNF217 | NR2F2 |
| ZNF217 | BRD2 |
| ZNF217 | BRD4 |
| ZNF217 | PGR |
| ZNF217 | POLR2A |
| ZNF217 | RAD21 |
| ZNF217 | RXRA |
| ZNF217 | SMARCA4 |
| ZNF217 | SMARCC1 |
| ZNF217 | SP1 |
| ZNF217 | SPI1 |
| ZNF217 | TCF12 |
| ZNF217 | TEAD4 |
| ZNF217 | TP63 |
| ZNF217 | USF1 |
| ZNF217 | USF2 |
| ZNF217 | CDK8 |
| ZNF217 | YY1 |
| ZNF217 | CDK9 |
| ZNF217 | CEBPA |
| ZNF217 | CEBPB |
| ZNF217 | AR |
| ZNF217 | ZNF384 |

## References

**References**

[1] Leek JT, Johnson WE, Parker HS, Jaffe AE, Storey JD. The sva package for removing batch effects and other unwanted variation in high-throughput experiments. Bioinformatics. 2012. 28(6): 882-3.

[2] Ben Salem K, Ben Abdelaziz A. Principal Component Analysis (PCA). Tunis Med. 2021. 99(4): 383-389.

[3] Chen Y, Wang X. miRDB: an online database for prediction of functional microRNA targets. Nucleic Acids Res. 2020. 48(D1): D127-D131.

[4] Shannon P, Markiel A, Ozier O, et al. Cytoscape: a software environment for integrated models of biomolecular interaction networks. Genome Res. 2003. 13(11): 2498-504.

[5] Zhou KR, Liu S, Sun WJ, et al. ChIPBase v2.0: decoding transcriptional regulatory networks of non-coding RNAs and protein-coding genes from ChIP-seq data. Nucleic Acids Res. 2017. 45(D1): D43-D50.

[6] Zhang Q, Liu W, Zhang HM, et al. hTFtarget: A Comprehensive Database for Regulations of Human Transcription Factors and Their Targets. Genomics Proteomics Bioinformatics. 2020. 18(2): 120-128.
